# Supplementary material for: Clinical correlation of lung ultrasound profiles in patients with COVID-19 infection
Source: bioRxiv or medRxiv preprint supplement (doi:10.1101/2021.04.05.21254935), 2021-04-07
Supplement: Supplementary file [file media-1.pdf]

## SUPPLEMENTARY MATERIAL

Yes/No for A/A', mention no. of B/B' lines  
 C/C': Mention is small and subpleural/shred/hepatization  
 W/F: Waterfall sign with densely confluent B lines. Combination of findings in views can be marked

| A | A' | B | B' | C | C' | W/F |
|---|----|---|----|---|----|-----|
|   |    |   |    |   |    |     |
|   |    |   |    |   |    |     |
|   |    |   |    |   |    |     |

| A | A' | B | B' | C | C' | W/F |
|---|----|---|----|---|----|-----|
|   |    |   |    |   |    |     |
|   |    |   |    |   |    |     |
|   |    |   |    |   |    |     |

Yes/No for A/A', mention no. of B/B' lines  
 C/C': Mention is small and subpleural/shred/hepatization  
 W/F: Waterfall sign with densely confluent B lines. Combination of findings in views can be marked

| A | A' | B | B' | C | C' | W/F |
|---|----|---|----|---|----|-----|
|   |    |   |    |   |    |     |
|   |    |   |    |   |    |     |
|   |    |   |    |   |    |     |

| A | A' | B | B' | C | C' | W/F |
|---|----|---|----|---|----|-----|
|   |    |   |    |   |    |     |
|   |    |   |    |   |    |     |
|   |    |   |    |   |    |     |

Yes/No for A/A', mention no. of B/B' lines  
 C/C': Mention is small and subpleural/shred/hepatization  
 W/F: Waterfall sign with densely confluent B lines. Combination of findings in views can be marked

| A | A' | B | B' | C | C' | W/F |
|---|----|---|----|---|----|-----|
|   |    |   |    |   |    |     |
|   |    |   |    |   |    |     |
|   |    |   |    |   |    |     |

| A | A' | B | B' | C | C' | W/F |
|---|----|---|----|---|----|-----|
|   |    |   |    |   |    |     |
|   |    |   |    |   |    |     |
|   |    |   |    |   |    |     |

**Figure 1S. Areas of lung where Ultrasound was performed.**

(Top- Posterior, Middle- Axillary, Bottom- Anterior)

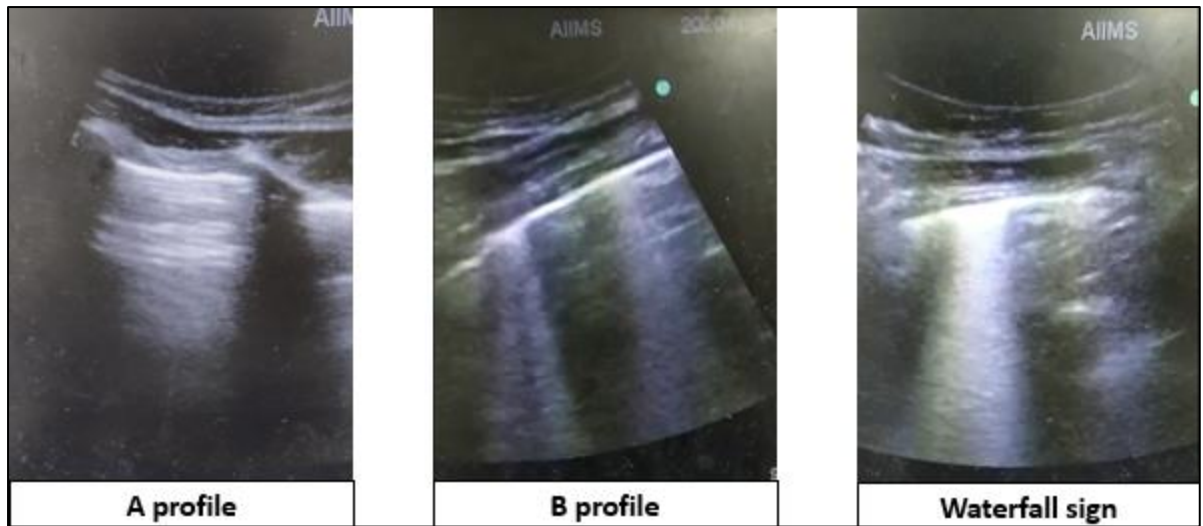

*Figure 2S. Lung ultrasound profiles*
